# Supplementary material for: Erythrocytes Induce Endothelial Injury in Type 2 Diabetes Through Alteration of Vascular Purinergic Signaling
Source: PubMed Central journal article supplement (PMC7774325; doi:10.3389/fphar.2020.603226), 2020-11-30
Supplement: datasheet1.pdf [file datasheet1.pdf]

## Supplementary materials

**Table 1.** Characteristics of rats for RBC transfusion

|           | Wistar to Wistar |                  | GK to Wistar |                  |
|-----------|------------------|------------------|--------------|------------------|
|           | Wistar donor     | Wistar recipient | GK donor     | Wistar recipient |
| n         | 6                | 6                | 12           | 12               |
| BW        | 515±55           | 499±58           | 334±36***    | 515±85           |
| B-glucose | 3.8±0.3          | 3.7±0.8          | 9.1±2.0***   | 4.1±0.7          |

*BW: body weight; GK: Goto-Kakizaki. Values are mean±SD; \*\*\*P<0.001 vs. values in the rest of columns by one-way ANOVA followed by Bonferroni's test.*

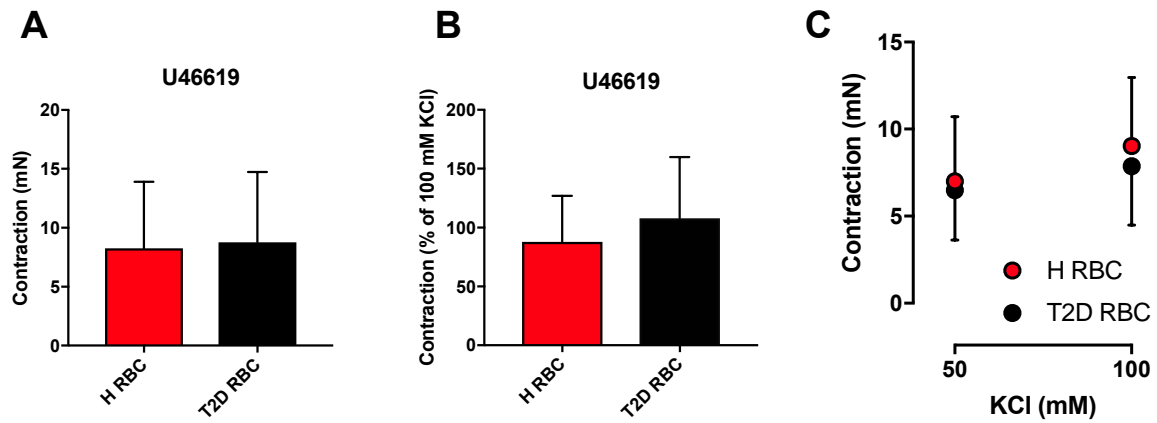

**Figure 1.** Effects of U46619 and KCl on vascular contraction. (A and B) Effects of U46619 on vascular contraction in aortas following incubation with RBCs from healthy subjects (H RBC, n=15) and type 2 diabetic patients (T2D RBC, n=17). (C) Effects of different concentrations of KCl on vascular contraction in aortas following incubation with H RBC (n=15) and T2D RBC (n=17). Values are mean  $\pm$  SD.
